# A longer stance is more stable for a standing horse

Karen Gellman<sup>1</sup> and Andy Ruina<sup>2</sup>

<sup>1</sup> Maximum HorsePower Research, Nottingham, PA 19362

<sup>2</sup> Mechanical Engineering, Cornell University, Ithaca, NY 14853

correspondence to: equinesportsmed@mac.com.

This draft: October 15, 2021

## Abstract

1  
2 **What is the effect of posture on the stability of a standing horse? We address this with a 2D quasi-**  
3 **static model. The model horse has 3 rigid parts: a trunk, a massless fore-limb and a massless rear**  
4 **limb, and has hinges at the shoulder, hip, and hooves. The postural parameter  $\ell_g$  is the distance**  
5 **between the hooves. For a given  $\ell_g$ , statics finds an equilibrium configuration which, with no mus-**  
6 **cle stabilization, is unstable. To measure the neuro-muscular effort to maintain stability, we add**  
7 **springs at the shoulder and hip; the larger the springs needed to stabilize the model, the more**  
8 **the neuro-muscular effort needed for stabilization. We find that a canted-in posture (small  $\ell_g$ ), ob-**  
9 **served in some pathological domestic horses, requires about twice the spring stiffness (representing**  
10 **twice the neuromuscular effort) as is needed for postures with vertical or slightly splayed-out (large**  
11  **$\ell_g$ ) legs.**

12 **Keywords:** statics, horse, posture, balance, equilibrium, stability, mechanism.

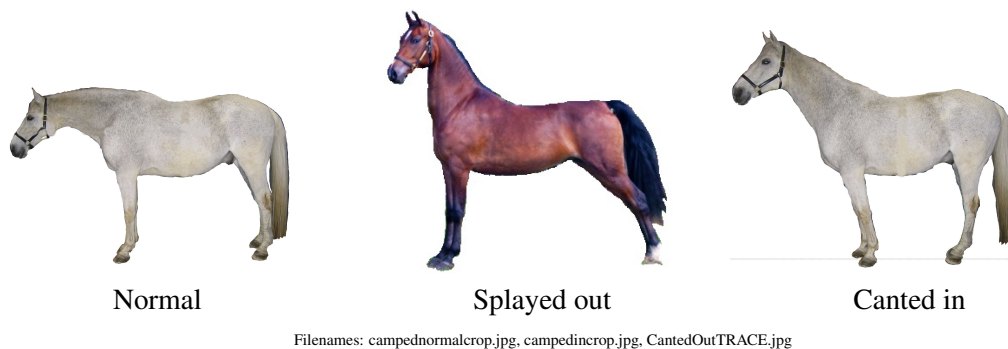

Figure 1: **Horse postures.** **Left:** *Normal*, neutral horse posture, legs are approximately vertical; **Center:** *Splayed-out*; the fore and hind feet are relatively spread; and **Right:** *Canted-in*, the fore hooves and hind hooves are closer together.

## 13 **1 Introduction**

14 The assumption that horses tend to minimize metabolic cost predicts some equine locomotion features (*e.g.*, gait  
15 transitions) [13, 10, 17, 14]. However, horses typically spending much more time (up to 23 hours a day), standing  
16 than on the move. They eat, socialize and sleep while standing. While the metabolic costs associated with locomotion  
17 are obvious, it also takes some effort to stand still. This paper uses a simple model to explore the idea that, as  
18 for locomotion, horses choose ways of standing that are relatively easy for them.

19 There are few studies of standing horse posture. Horse postural sway has been characterized with stabilograms  
20 (trajectories of the net center of pressure) [5, 6]. As with humans [16], the clinical utility of using stabilograms  
21 to measure postural competence is likely limited. Lesimple, Fureix et al [9, 18] found that a horse with high head  
22 height, relative to back height, tended to be in stress or pain. Physiotherapists claim a correlation between equine  
23 thoracolumbar spinal contours and back pain [26, 28]. Textbooks (*e.g.*, [2]) (incorrectly, we believe) describe some  
24 postures as ‘conformations’, categorizing these postures as built-in physical features of the horses body rather than  
25 as outputs of neuromuscular control.

26 Feral horses living in a natural unconfined environment, and most appropriately-managed domestic horses, are  
27 usually seen with visually-vertical limbs. There are various reasons that long-legged animals might choose to stand  
28 with vertical, as opposed to canted-in or splayed-out, legs. (See Fig.1)

29 1. The compression force in the legs is minimized by having vertical, as opposed to sloped, legs (see Methods);

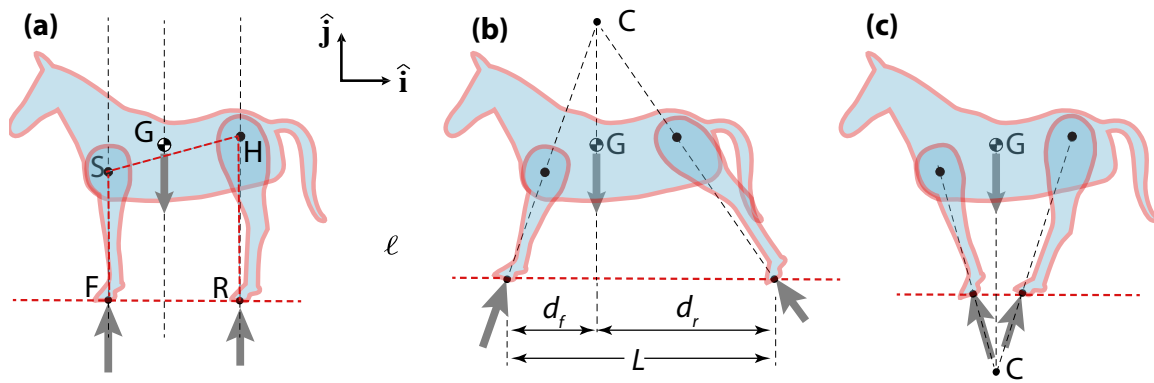

Filename: wholehorse3body2body.pdf

Figure 2: **Three muscle-free equilibrium postures:** (a) Vertical legs; (b) Splayed-out; and (c) Canted-in. In our 2D model, a whole horse has three forces acting on it: 1) gravity; 2) the ground reaction force on the hind feet; and 3) the ground reaction force on the fore feet. Static equilibrium of the whole horse, a ‘three-force object’, demands that these ground forces are either (a) parallel and vertical; or (b) they intersect directly above the center of mass (CoM); or (c) they intersect directly below the CoM (see appendix B for reasoning). The corrective joint torques needed to stabilize these equilibria are considered in Fig. 3.

- 30 2. In locomotion, the range of leg motion is roughly centered on vertical (protraction and retraction of the limb
- 31 are approximately symmetric relative to vertical). So, neither agonist nor antagonist muscles at the shoulder
- 32 or hip are near their maximum (possibly uncomfortable) lengths when the leg is vertical.
- 33 3. The peak vertical ground reaction forces in running gaits occur when the legs are near to vertical, so the bones,
- 34 muscles, tendons and ligaments are configured for carrying loads with vertical legs. Conversely, standing with
- 35 vertical legs might help align the internal structures for the running leg loads;
- 36 4. Horses are prey animals; a horse with vertical legs is perhaps most ready to step in any direction.

37 Yet, horses do sometimes choose splayed-out or canted-in postures.

38 Horses choose a splayed-out posture when carrying a heavy rider, when holding a heavy cart stationary (‘parked’),  
 39 when a mare is in the late stages of pregnancy, or in the first hours that a newborn foal stands. The intuitive idea,  
 40 which we buttress with our model here, is that a splayed-out posture is more stable.

41 On the other hand, canted-in postures, in which horses stand with their legs relatively close together beneath their  
 42 trunk, are seen in some horses with chronic performance deficits (J.M. Shoemaker, DVM — personal communica-  
 43 tion), in horses with Equine Motor Neuron Disease (EMND, [7, 29]), and, perhaps, in extreme fatigue (Appendix

44 G). In contrast to the possible stability gain from a splayed-out postures, the possible reasons some horses choose  
45 a canted-in posture are less obvious. Perhaps,

- 46 1. The horse has distorted proprioception so misperceives its body position, and holds inappropriate posture,  
47 which happens to be canted-in;
- 48 2. The horse has an impairment of postural control or motor output such that it is unable to stand with vertical  
49 or splayed out legs;
- 50 3. The canted in posture allows the horse to ‘lean’ on ligaments or bones in ways that may be painful or injurious,  
51 but relieve the burden on impaired muscles (see Appendix G);
- 52 4. Following the model of Scrivens *et al* [25] for human standing, a canted-in posture may be easier to stabilize  
53 if selecting control gains is the primary neuro-muscular challenge and neural delays are non-negligible (see  
54 Appendix E).

55 Our approach to understanding postural choice here, is to study the statics and stability of standing postures. In  
56 particular, how does a horse’s choice of leg splay (vertical vs splayed-out vs canted-in) affect the difficulty of  
57 maintaining stability?

58 Our approach is the same as some have used for stability of grasp (*e.g.*, [27, 21]), except that we have a more  
59 general interpretation of stiffness which includes stiffness that is approximated by quick linear feedback. Our  
60 approach is a simpler statics calculation for the same model pursued by [25, 3] and [12] using dynamics; their work  
61 also incorporates neural time delays, which we neglect (see Methods, Discussion and Appendix E).

62 As noted in [12], the simple idea that a broader stance is more stable because the base of support (the polygon  
63 defined by the hoof positions) is bigger, is not key. In our model, an uncontrolled standing horse is a unstable  
64 mechanism, even when there is no danger of tipping over like a plastic horse.

65 There is no single obvious way to quantify the “difficulty of maintaining balance.” The appropriate measure of  
66 difficulty depends on the nature of the employed control system. In particular, the torques used to stabilize an  
67 equilibrium posture may come from tonic contractions or co-contractions (*e.g.*, [22]), from proportional feedback  
68 with delays (*e.g.*, [12]), or from intermittent feedback based on an internal model [20]. Here, we assume that the  
69 tonic component is either significant in itself, or is a reasonable proxy (for our purposes) of the other mechanisms.



70 We quantify degree of instability by the minimum stiffness  $k_{\min}$  of shoulder and hip springs that, if added, could  
71 stabilize an equilibrium posture. Use of  $k_{\min}$  as a proxy for neuro-muscular control effort may be regarded narrowly  
72 as measuring the difficulty of maintaining balance with tonic contractions alone. Or,  $k_{\min}$  might be interpreted more  
73 broadly as representative of the challenge of control by all mechanisms combined. Our use of  $k_{\min}$  as a proxy for  
74 neuro-muscular control difficulty would be inappropriate if neural delays are actually the primary control challenge  
75 for standing horses. These issues are further discussed in Appendix E. The minimum stiffness  $k_{\min}$  is equivalent to  
76 the minimum needed gain, if both the sensing and torque output are at the shoulder and hip joints.

## 77 **2 Methods**

78 We make the common biomechanical approximation that a whole animal is a linkage of rigid parts connected by  
79 hinges. During quiet stance, the lower leg-joints of the weight-bearing legs are generally locked in an extended  
80 (generally straight) configuration, and there is little deformation of the back. So, we assume that stabilizing the  
81 spine, and holding the legs straight, is either non-problematic for a horse, or is an equal problem independent  
82 of stance width. Hence, the deformations of interest here are only the rotations at the shoulder and hip joints. By  
83 “shoulder” and “hip” we henceforth mean the effective centers of rotation of the model legs relative to the body (See  
84 Appendix F for specific parameters of the model). Standing involves relatively slow motions, so our model uses  
85 statics. See Appendix A for discussion of the neglect of ‘inertial forces’ (note, again, our simplification of dynamics  
86 to statics is in contrast to the dynamics postural models of [25, 3] and [12]). Because the legs are much lighter than  
87 the body, for simplicity, we neglect the weight of the legs. Thus, we consider the statics of a two-dimensional horse  
88 consisting of a rigid body (trunk, neck and head), with mass, that is supported by negligible-mass, rigid fore-legs  
89 and hind legs.

90 For simplicity, and because it is most relevant to our observations of horses, we consider the sagittal plane (side  
91 view) only. The sagittal plane horse model here is similar to the frontal plane models used for analysis of standing  
92 cats and humans used by [25, 3] and [12]. As in [25, 3, 12], the model here is a ‘four-bar’ linkage. Like [25, 3],  
93 our model has no other moving parts (in contrast, [12] uses a similar model that also has an independently moving  
94 upper body). The frontal-plane models of [3] and [12] are left-right symmetrical. In contrast, our horse model does  
95 not have that symmetry (front is different from back). Using this 3-link model (4-bar linkage, including the ground  
96 as a link), we consider two statics features:

97 **1) Geometry of Equilibrium.** For a given foot spacing, basic statics (Appendix B) finds those postures for  
98 which the linkage carries the whole load without joint torques (assuming a perfect model and no disturbances).  
99 In these joint-torque-free postures the ‘horse’ (meaning our model of a horse) and all of its parts obey the laws  
100 of static equilibrium (*i.e.*, forces and moments ‘balance’ on all of the parts). For symmetric models, as in [3]  
101 and [12], this posture is found by inspection as the symmetric posture. Because a horse is not front-back  
102 symmetric, nor is our model, finding equilibrium postures requires a statics calculation.

103 **2) Stability of equilibrium.** An equilibrium posture, as found above, can be stable or unstable (Appendix C).  
104 An unstable equilibrium posture will, if disturbed slightly, tend to deviate progressively. In contrast, a stable  
105 equilibrium posture is one that, if slightly disturbed, will spontaneously tend to recover. Here, we want to  
106 quantify the degree of instability of an unstable posture. We seek a measure of the neuro-muscular effort  
107 needed for stabilization. Our proxy for this is the amount of joint torque needed to bring the horse back to  
108 equilibrium after a given small disturbance. In particular we quantify instability by the stiffness of the springs  
109 at the shoulder and hip needed to achieve stability. As noted above, we differ from [25, 3] in our quantification  
110 of this effort (Appendix E).

111 The distinction between an equilibrium posture and a stable equilibrium posture, can be understood by analogy  
112 with a pendulum (a stick hinged at one end). A pendulum is in equilibrium if pointed straight down or if pointed  
113 straight up. However, only straight down is a stable equilibrium. The unstable, straight-up equilibrium of a pen-  
114 dulum can be stabilized by adding correction (a force or torque that rights the pendulum when it deviates from  
115 upright). For example, a sufficiently stiff torsional spring at the hinge will stabilize the upright, otherwise unstable,  
116 equilibrium. Since a longer or heavier upright pendulum needs a stiffer spring to be stabilized, it might be regarded  
117 as more unstable than a shorter, or lighter pendulum, if we measure instability by the stiffness of the minimal  
118 stabilizing spring (see Appendix D for expansion of this pendulum analogy and implications for various candidate  
119 quantifications of instability).

120 The equilibrium postures are found using the statics (force and moment balance) of each leg, and the statics of  
121 the whole ‘horse’, as described in detail in Appendix B. Stability is determined by whether the equilibrium is, or  
122 is not, at a potential energy minimum. The gravitational potential energy is calculated numerically for postures  
123 that are close to the equilibrium postures. For unstable postures, the degree of instability is quantified, in our  
124 model, by stabilizing the horse with equal springs at the shoulder and hip. As noted, these springs are proxy for  
125 neuromuscular effort in the living horse. The spring potential-energy is then added to the gravitational potential

126 energy. We find the smallest springs ( $k_{\min}$ ) necessary to bring the net potential energy to a local minimum. We  
127 then assess degree of stability by looking at the needed stiffness to stabilize a horse with a given leg splay. The  
128 details of these calculations are described in Appendix C.

129 **Leg compression force.** In this analysis, we lose little accuracy by replacing our model with one in which the fore  
130 and hind legs have equal length. The compression in the legs,  $F_c$ , is then proportional to  $W/\cos\theta$ , where  $W$  is the  
131 weight born by the leg and  $\theta$  is the deviation from vertical. For small angles, this is approximately quadratic in leg  
132 angle,  $F_c \approx W(1 + \theta^2/2)$  (where  $\theta$  is measured in radians), and is not a dramatic effect. For example, for  $\theta = 15^\circ$   
133 the compression is increased by 3.5% compared to having vertical legs ( $\theta = 0^\circ$ ). Canted-in or splayed-out limb  
134 angles seen in living horses are usually under  $\theta = 15^\circ$  [11].

### 135 3 Results

136 **The muscle-free equilibrium postures** have a simple geometric interpretation (Fig. 2). Consider a vertical line  
137 through the center of mass; a line defined by the front hooves and shoulder; and a line defined by the rear hooves  
138 and hip. Because the legs are ‘two-force-objects’ and the body is a ‘three-force object’ these three lines are either  
139 parallel (Fig. 2a, and Appendix B), or they intersect above or below the horse at C (Figs. 2b and c). These postures,  
140 if exact, don’t need joint torques to be maintained. Thus, we expect the postures that horses adopt would be close  
141 to these. For example, if the legs are parallel, they should be vertical (not slanted) with respect to the ground —  
142 making a rectangle. A horse with parallel slanted legs is not in a muscle-free equilibrium posture.

143 **Degree of stability.** For an standing horse, physically-realizable muscle-free equilibrium postures are all unsta-  
144 ble; that is, the equilibrium postures are postures in which small deviations from equilibrium would tend to grow  
145 rather than be naturally restored. In other words, for all of the equilibrium postures of interest, the center of mass  
146 height is at a (local) maximum. This instability occurs whether the leg-lines intersection point C is above or be-  
147 low the horse. Here, we add springs at teh hip and shoulder and find  $k_{\min}$ , the smallest spring that stabilizes the  
148 muscle-free equilibrium postures. Our basic modeling postulate is this:

149 *A posture with a bigger  $k_{\min}$  is more unstable.*

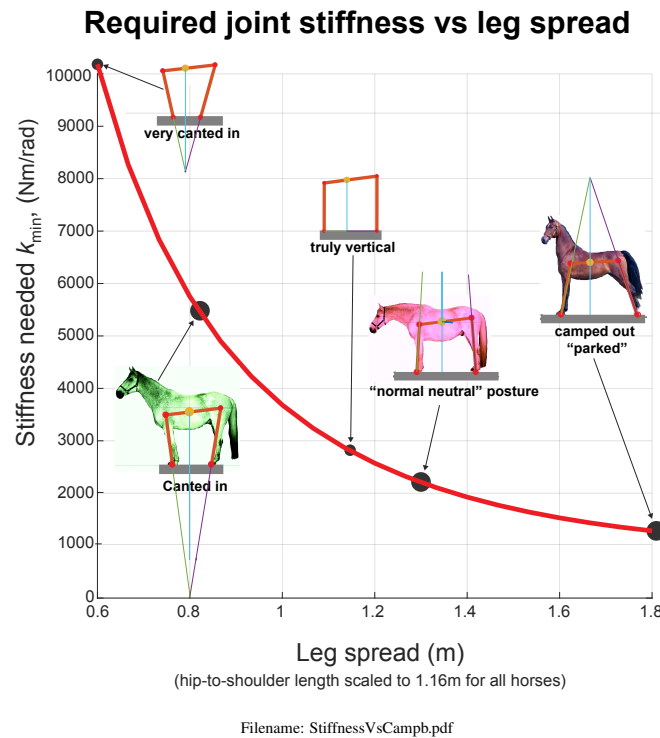

Figure 3: **Stiffness vs Leg Splay.** For a given horse geometry (leg lengths, back length, location of CoM) and for a given splay (distance between fore and hind hooves) the ‘horse’ (modeled as a linkage) has an equilibrium configuration satisfying the statics three-force-object rules for the horse and the statics two-force-object rules for the legs (see Fig. 2). This equilibrium can be stabilized with equal springs at the shoulder and hip. The size  $k_{min}$  of the minimum spring is plotted as a function of leg splay. The central results of this paper are the differences between  $k_{min}$  for the normal neutral posture and for the splayed-out and canted-in postures. To be stable, the canted-in posture needs a (spring) stiffness ( $k_{min} \approx 5400$  Nm/rad) that is more than twice that needed for the normal neutral posture ( $k_{min} \approx 2100$  Nm/rad for NNP). The splayed out posture is even more intrinsically stable than NNP in that it needs only about 60% of the  $k_{min}$  required by NNP.

150 The central result of the calculations, found in the appendices, are shown in Fig. 3:

151 *A horse, when legs are canted in (legs closer together) needs much larger corrective springs (by more*  
 152 *than a factor of 2) than when legs are vertical or slightly splayed out (normal neutral posture, NNP).*

153 Although the 4-bar linkage model of a human in [3] differs in quantitative detail (relatively shorter body, reflection  
 154 symmetry) from our horse model, the mechanics seems to show all the same trends as our model. In particular,  
 155 [3] noted, as is true here, that the joints have more mechanical advantage for supporting the center of mass in the  
 156 splayed-out configuration (see appendix C).

157 A final statics result is that Within the commonly observed range of horse postures, the compressive forces in the  
158 legs, while minimized by vertical legs, are only slightly increased with canted-in or splayed-out legs.

## 159 **4 Discussion**

160 In normal, sound horses the most common posture is standing with metacarpal and metatarsal bones visually  
161 vertical. In this posture the legs are slightly splayed-out with reference to the shoulder/hip to hoof angle, as seen in  
162 Fig. 3. We term this normal neutral posture (NNP): normal in that it is most common in healthy and feral horses;  
163 neutral in that it equally allows leg movement in any direction, posture. Our model predicts greater stability in  
164 splayed-out postures, thus possibly explaining

- 165 • Why horses needing an extra degree of stability often display splayed-out postures; and
- 166 • Why we rarely observe persistent canted-in postures in normal healthy situations.

167 Like horses, humans adopt a wider stance when lifting heavy weights or standing on unstable surfaces.

168 Why don't humans and quadrupeds always use a more-spread stance? Stability is only one of several situationally-  
169 dependent goals. In Fig. 3, the leg compression changes minimally between NNP (slightly splayed) and more  
170 obviously splayed-out, and more stable, posture. Perhaps the various benefits of nearly vertical legs outweigh the  
171 stability-benefits of a wider splayed-out stance.

172 Why, then, are canted-in postures ever seen in horses (or people)? Narrow-stance postures seem to be associated  
173 with neural impairment with sensory input, neural processing or motor output concerning postural control (See  
174 Appendix G for speculation on another cause of collapsed posture).

- 175 1. Parkinson's Disease (PD) patients (humans) have a characteristic collapsed standing posture that includes  
176 having a narrow stance. Parkinson's is a degenerative disorder of the human central nervous system [15] in  
177 which patients have lost dopaminergic neurons in the midbrain, a critical region for postural control, resulting  
178 in a dysfunction of central postural processing.
- 179 2. Equine Motor Neuron Disease (EMND) is a condition for which canted-in limb posture is pathognomonic  
180 (characteristic) in horses. In this degenerative neuropathy, similar to ALS in humans, there is cell death and

181 consequent denervation atrophy in postural muscles [29]. EMND patients habitually display extreme canted-  
182 in postures, fatigue quickly and spend much horse time lying down [7]. This is a defect in the postural motor  
183 output.

184 3. Abnormal Compensatory Posture (ACP), a narrow stance seen in some domesticated horses, appears to be  
185 caused by structural distortions in some critical mechanoreceptor-rich anatomic regions (the hooves, the stom-  
186 atognathic system, and the upper cervical area) due to practices associated with domestication. In these horses,  
187 the inaccurate proprioceptive signals are altering neural processing and motor output. Horses habitually stand-  
188 ing with canted-in posture often develop a predictable set of musculoskeletal problems, including: navicular  
189 syndrome, negative palmar/plantar angles, digital cushion degeneration, hock and stifle osteoarthritis, sacro-  
190 iliac fixation or hypermobility, back pain, “kissing spines”, neck pain, and more (Judith M. Shoemaker DVM  
191 — personal communication). Their posture reverts to a visually vertical stance (NNP) when these structural  
192 and functional distortions are corrected [11]. ACP is a defect in sensory (proprioceptive) input.

193 As noted, Bingham *et al* [3] use a mechanical model, similar to ours but come to the opposite conclusion. They  
194 predict that a narrow-stance (canted-in) posture is ‘more stable’ whereas we find it is less stable. Bingham *et al*  
195 [3] argue that narrow stance might benefit human PD patients because, in their model the range of feedback gains  
196 which stabilize a narrow stance is greater than the range of gains that can stabilize a wider stance. Thus, they claim,  
197 finding a successful stabilizing gain is easier for a narrow rather than for a wider stance (see Appendix E for further  
198 comparisons with [3]).

199 Neither zoologists nor veterinarians have an accepted standard for ‘normal’ standing horse posture. Because stand-  
200 ing is so much of a horses life, perhaps evaluation of habitual posture should be included as part of any clinical  
201 exam, or in developing a management program. The slightly-splayed-out NNP posture perhaps represents a trade-  
202 off between the stability benefits of more extreme splay and *e.g.*, the quick-escape benefits of mostly vertical legs.  
203 On the other hand, sports injury, poor athletic performance and chronic or recurring lameness are common sequelae  
204 in domestic horses who habitually display an abnormal compensatory posture (ACP) of canted-in limbs rather than  
205 a normal neutral posture (NNP). Future studies will aim to characterize the anatomic distortions associated with  
206 ACP and track restoration of NNP through correcting these structures.

## 207 **Acknowledgments**

208 We thank Judith M. Shoemaker, DVM for clinical commentary on performance horses and editorial input, Elizabeth  
209 Reese, CTAT, MEd for discussions on posture and movement in humans, and Carl DeStefano, DC, DACNB,  
210 FACFN for discussions on CNS patterning. Robert Paterka, Lena Ting, Art Kuo, and Madhusudhan Venkadesan,  
211 all knowledgeable of the dynamics of standing still, made comments that helped us place our simple model in  
212 context.

## 213 **Competing Interests**

214 Authors declare no competing or financial interests.

## 215 **Author contributions**

216 KG posed the question and provided concepts of posture for horses. AR made the figures, the numerical model and  
217 wrote the appendices. KG and AR contributed equally to the main text.

## 218 **Funding**

219 Research on equine posture was supported in part by a grant from the American Holistic Veterinary Medical  
220 Foundation (AHVMF).

## 221 **References**

- 222 [1] CJ Alcott. Evaluation of ataxia in the horse. *Equine Veterinary Education*, 29(11):629–636, 2017.
- 223 [2] Gary M. Baxter, Ted S. Stashak, and Kevin G. Keegan. *Examination for Lameness*, chapter 2, page 85. John  
224 Wiley & Sons, Ltd, 2020.
- 225 [3] Jeffrey T Bingham, Julia T Choi, and Lena H Ting. Stability in a frontal plane model of balance requires cou-

- 226       pled changes to postural configuration and neural feedback control. *Journal of neurophysiology*, 106(1):437–  
227       448, 2011.
- 228 [4] Lisa M Bunn, Jonathan F Marsden, Paola Giunti, and Brian L Day. Stance instability in spinocerebellar ataxia  
229       type 6. *Movement Disorders*, 28(4):510–516, 2013.
- 230 [5] Hilary M Clayton, David E Bialski, Joel L Lanovaz, and David R Mullineaux. Assessment of the reliability of  
231       a technique to measure postural sway in horses. *American journal of veterinary research*, 64(11):1354–1359,  
232       2003.
- 233 [6] Hilary M Clayton, Rachel Buchholz, and Sandra Nauwelaerts. Relationship between morphological and  
234       stabilographic variables in standing horses. *The Veterinary Journal*, 198:e65–e69, 2013.
- 235 [7] Thomas J Divers, Hussni O Mohammed, and John F Cummings. Equine motor neuron disease. *Veterinary*  
236       *Clinics of North America: Equine Practice*, 13(1):97–105, 1997.
- 237 [8] James Earl Fraser. *End of the Trail*. [https://www.metmuseum.org/exhibitions/listings/  
238       2013/the-american-west-in-bronze/blog/posts/end-of-the-trail](https://www.metmuseum.org/exhibitions/listings/2013/the-american-west-in-bronze/blog/posts/end-of-the-trail), 1918.
- 239 [9] Carole Fureix, Martine Hausberger, Emilie Seneque, Stéphane Morisset, Michel Baylac, Raphaël Cornette,  
240       Véronique Biquand, and Pierre Deleporte. Geometric morphometrics as a tool for improving the comparative  
241       study of behavioural postures. *Naturwissenschaften*, 98(7):583–592, 2011.
- 242 [10] SM Gatesy and AA Biewener. Bipedal locomotion: effects of speed, size and limb posture in birds and  
243       humans. *Journal of Zoology*, 224(1):127–147, 1991.
- 244 [11] Karen Gellman, Judith M Shoemaker, and Elizabeth M Reese. Normal neutral and abnormal compensatory  
245       postures in horses. *in preparation*, 2021.
- 246 [12] Adam D Goodworth, Patricia Mellodge, and Robert J Peterka. Stance width changes how sensory feedback  
247       is used for multisegmental balance control. *Journal of neurophysiology*, 112(3):525–542, 2014.
- 248 [13] NC Heglund, MA Fedak, CR Taylor, and GA Cavagna. Energetics and mechanics of terrestrial locomotion.  
249       iv. total mechanical energy changes as a function of speed and body size in birds and mammals. *Journal of*  
250       *Experimental Biology*, 97(1):57–66, 1982.



- 251 [14] Donald F Hoyt, Steven J Wickler, Darren J Dutto, Gwenn E Catterfeld, and Devin Johnsen. What are the rela-  
252 tions between mechanics, gait parameters, and energetics in terrestrial locomotion? *Journal of Experimental*  
253 *Zoology Part A: Comparative Experimental Biology*, 305(11):912–922, 2006.
- 254 [15] Seyoung Kim, Fay B Horak, Patricia Carlson-Kuhta, and Sukyung Park. Postural feedback scaling deficits in  
255 parkinson’s disease. *Journal of neurophysiology*, 102(5):2910–2920, 2009.
- 256 [16] Herman Kingma, Gerome C Gauchard, Catherine De Waele, Christian Van Nechel, Alexandre Bisdorff, Alain  
257 Yelnik, Mans Magnusson, and Philippe P Perrin. Stocktaking on the development of posturography for  
258 clinical use. *Journal of Vestibular Research*, 21(3):117–125, 2011.
- 259 [17] Rodger Kram and C Richard Taylor. Energetics of running: a new perspective. *Nature*, 346(6281):265–267,  
260 1990.
- 261 [18] Clémence Lesimple, Carole Fureix, Emmanuel De Margerie, Emilie Sénèque, Hervé Menguy, and Martine  
262 Hausberger. Towards a postural indicator of back pain in horses (equus caballus). *PloS one*, 7(9):e44604,  
263 2012.
- 264 [19] Ian D Loram, Constantinos N Maganaris, and Martin Lakie. Active, non-spring-like muscle movements  
265 in human postural sway: how might paradoxical changes in muscle length be produced? *The Journal of*  
266 *physiology*, 564(1):281–293, 2005.
- 267 [20] Ian D Loram, Constantinos N Maganaris, and Martin Lakie. Human postural sway results from frequent,  
268 ballistic bias impulses by soleus and gastrocnemius. *The Journal of physiology*, 564(1):295–311, 2005.
- 269 [21] Denis Rancourt and Neville Hogan. Stability in force-production tasks. *Journal of motor behavior*, 33(2):193–  
270 204, 2001.
- 271 [22] Tristan David Martin Roberts and TDM Roberts. *Neurophysiology of postural mechanisms*. Butterworths  
272 London, 1978.
- 273 [23] Andy Ruina. Slip instability and state variable friction laws. *Journal of Geophysical Research: Solid Earth*,  
274 88(B12):10359–10370, 1983.
- 275 [24] Andy Ruina and Rudra Pratap. *Introduction to Statics and Dynamics*. Self-published, 2019.

- 276 [25] Jevin E. Scrivens, Lena H. Ting, and Stephen P. DeWeerth. Effects of stance width on control gain in standing  
277 balance. In *2006 International Conference of the IEEE Engineering in Medicine and Biology Society*, pages  
278 4055–4057, 2006.
- 279 [26] Amy Shakeshaft and Gillian Tabor. The effect of a physiotherapy intervention on thoracolumbar posture in  
280 horses. *Animals*, 10(11):1977, 2020.
- 281 [27] Neelima Sharma and Madhusudhan Venkadesan. Finger stability in precision grips. *Manuscript in prepara-*  
282 *tion*, 2021.
- 283 [28] Gillian Tabor, Ami Elliott, Natacha Mann, and Jane Williams. Equine posture analysis: Development of a  
284 simple tool to record equine thoracolumbar posture. *Journal of Equine Veterinary Science*, 73:81–83, 2019.
- 285 [29] BA Valentine, A De Lahunta, C George, BA Summers, JF Cummings, TJ Divers, and HO Mohammed. Article  
286 commentary: Acquired equine motor neuron disease. *Veterinary pathology*, 31(1):130–138, 1994.

287

# Supplemental Appendices

288 These appendices are not intended to be in the journal, but are for an electronic supplement. These have

- 289 • Details that need mention, but which would distract from the main text;
- 290 • Expanded discussions of some topics; and some
- 291 • Pedagogical explanations.

## 292 Contents of appendices

|     |                                                                                     |           |
|-----|-------------------------------------------------------------------------------------|-----------|
| 293 | <b>A. Basic modeling principles</b> .....                                           | <b>16</b> |
| 294 | A horse is a linkage .....                                                          | 16        |
| 295 | Free Body Diagrams .....                                                            | 16        |
| 296 | Statics vs Dynamics .....                                                           | 17        |
| 297 | 2D vs 3D .....                                                                      | 19        |
| 298 | <b>B. The horse model</b> .....                                                     | <b>21</b> |
| 299 | A standing horse is a three-force object .....                                      | 21        |
| 300 | Features of 3-force object equilibrium .....                                        | 22        |
| 301 | Approximating legs as two-force objects .....                                       | 23        |
| 302 | Equilibrium of standing, taking account of the legs as two-force objects .....      | 24        |
| 303 | <b>C: Calculation of stability of a standing horse</b> .....                        | <b>25</b> |
| 304 | Calculation of stability using potential energy .....                               | 25        |
| 305 | Numerical calculations .....                                                        | 27        |
| 306 | Intuitive explanation of stability .....                                            | 27        |
| 307 | <b>D. Pendulum analogy</b> .....                                                    | <b>28</b> |
| 308 | Equilibrium .....                                                                   | 28        |
| 309 | Stability of equilibrium .....                                                      | 29        |
| 310 | Quantifying pendulum instability .....                                              | 29        |
| 311 | <b>E. Neglect, or not, of neural delays; passive tonic vs active feedback</b> ..... | <b>32</b> |
| 312 | <b>F. Parameters in the model</b> .....                                             | <b>36</b> |
| 313 | <b>G. Collapsed postures</b> .....                                                  | <b>38</b> |

314

## 315 **Appendix A: Basic modeling issues**

316 In this appendix we review some of the reasoning behind, and concepts related to, the basic model features we use.

### 317 **A horse is a linkage**

318 The common biomechanical model of a large terrestrial vertebrate is a linkage of rigid parts. For example, each leg  
319 is modeled as a set of rigid links, with each link representing a bone and the flesh on that bone. The main body of  
320 a horse is typically modeled as a single rigid object. In this model, a horse is a collection of rigid parts connected  
321 with hinges. This neglects deformations, or, rather, assumes that the mechanical consequences of non-linkage-like  
322 deformations are small enough in their effects so as to be negligible. The key neglected motions are the motion of  
323 flesh relative to bone, and that real joints are not precisely hinges nor ideal ball-in-socket joints.

324 The torques (moments) transmitted across a real horse's joints can be from various sources:

- 325 1. Joint friction, which is presumed negligible for our simple analysis;
- 326 2. Complex joint contact wherein there is not a single (*e.g.*, center-of-sphere) effective hinge location, which we  
327 do not consider here; we assume frictionless pin joints;
- 328 3. Tension in muscles and tendons. These are of central concern for the stability calculations but are (unless  
329 otherwise stated) neglected in the equilibrium calculations;
- 330 4. Tension in ligaments, which we consider as part of the joint mechanism and do not consider in any explicit  
331 way; and
- 332 5. Other soft tissue stresses (*e.g.*, skin tension), which we assume are negligible.

333 This model analysis is a study of 3: the forces and moments due to muscles and tendons (these are neglected in the  
334 statics analysis, they are the topic of interest in the stability analysis).

### 335 **Free Body Diagrams (FBDs).**

336 A free body diagram (Fig. 2) is a sketch of the system and of all of the external (from outside the system) forces  
337 and moments (torques) on it. When considering equilibrium of a horse we can consider the horse as a whole, or in  
338 parts. Here, we will consider free body diagrams of these subsystems:

- 339 1. the whole horse including body, head, tail and legs;
- 340 2. the horse body, from the legs up;
- 341 3. the fore-legs (for a two-dimensional analysis, effectively a single fore-leg); and
- 342 4. the rear legs (also treated, in 2D, as a single effective rear leg).

343 Forces and moments that are internal to the subsystem do not show on free-body diagrams. For example, in the  
344 free-body diagram of the whole horse (Fig. 2), there are no muscle forces shown, because they act internally to that  
345 system (or, if you like, they act in action-reaction pairs that cancel each other out). The relevant external forces are,  
346 depending on the free-body-diagram,

- 347 1. the force of gravity on that part;
- 348 2. the force of the ground on the horse feet (for the FBD of the horse and for the FBDs of the legs);
- 349 3. the force transmitted across the shoulder or hip joint, from legs to body, or *vice versa*, for free body diagrams  
350 of the horse body or of the horse legs;
- 351 4. the muscle, tendon and ligament torques at the shoulder or hip, from legs to body, or *vice versa*, for free body  
352 diagrams of the horse body or of the horse legs.

353 In the statics calculations we are finding minimum-effort postures. We seek postures in which the muscle and  
354 tendon moments are zero.

### 355 **Statics vs Dynamics.**

356 Outside of discussions of postural stability, a standing horse is generally considered to be standing ‘still’, which  
357 means that any motion is negligible. However, all standing involves slight swaying movements due to involuntary  
358 functions like breathing. These movements cause motion of the person or animal’s center of mass. Further, using  
359 neurologic control to maintain stability involves corrective motions. In other words, a standing horse or human is  
360 always moving at least a little bit. For our purposes here, statics (how forces balance when there is no motion)  
361 is a good-enough approximation to the more-realistic and more complete dynamics analysis (how forces do not  
362 balance, and the consequent motion).

363 How can you tell whether statics can be an accurate approximation of dynamics? Imagine writing all of the full  
364 dynamics equations ( $\sum \vec{F}_i = m\vec{a}$ , etc.). Then, take those same equations, but set all of the accelerations to zero.  
365 Those are the statics equations (Eqs. 5, in Appendix B). If the solutions of those two sets of equations, the dynamics  
366 equations and the statics equations, are negligibly different, then one is in a situation where statics can be applied.  
367 Generally, this holds true when ‘inertial forces’ ( $m_i\vec{a}_i$ ) are negligible. That is, when inertial terms are much less  
368 than typical forces.

$$369 \quad m_r|\vec{a}_r| \ll |\vec{F}_r| \quad (1)$$

370 where  $m_r$ ,  $\vec{a}_r$  &  $\vec{F}_r$  are the mass, acceleration and relevant force, respectively, of the relevant horse part (subscript  
371 ‘r’= “relevant”). That is, even though everything is always moving, at least a little, a statics analysis is appropriate  
372 if the various forces tend to cancel each other out rather than summing to cause motion. The amount that the forces  
373 don’t exactly cancel (meaning that they don’t exactly satisfy the laws of statics, Eqs. 5) gives the little bits of  
374 motion. Yet, these little bits of motion, the slight swaying movements of a horse, might be considered negligible  
375 for calculating forces. In particular, a horse that is standing and swaying slowly, is probably accurately-enough (at  
376 least for study of the choice of basic posture), modeled as always being in static equilibrium without considering

377 the dynamics of swaying. Eqs. 5 will give almost identical answers as would a full ‘inverse-dynamics’ analysis.  
 378 These calculations are shown below

379 Unless one is, for instance, studying the leg while kicking, for a horse, typical forces come from the weight  $m_{horse}g$ ,  
 380 where  $g \approx 10 \text{ m/s}^2$  is the gravitational constant. And inertial forces are associated with the horse accelerations  
 381  $m_{horse}a_{horse}$ .

### 382 **Estimating the validity of the statics approximation for a standing swaying horse.**

For a horse swaying back and forth a distance  $d$ , with frequency  $f$  (oscillations/s), the acceleration is about  $a_{horse} = (d/2)4\pi^2 f^2$ . For example, consider a horse swaying back and forth 1 cm ( $d = .005 \text{ m}$ ) every 4 seconds ( $f = .25/\text{s}$ ) ([6]).

$$\begin{aligned}
 m_i |\vec{a}_i| &\stackrel{?}{\ll} |\vec{F}_i| \\
 m_{horse} a_{horse} &\stackrel{?}{\ll} m_{horse} g \\
 a_{horse} &\stackrel{?}{\ll} g \\
 (d/2)4\pi^2 f^2 &\stackrel{?}{\ll} g \\
 (0.005 \text{ m})4\pi^2 .25^2/\text{s}^2 &\stackrel{?}{\ll} 10 \text{ m/s}^2 \\
 0.012 &\stackrel{?}{\ll} 10 \tag{2} \\
 0.12\% &\stackrel{yes}{=} \text{small} \tag{3}
 \end{aligned}$$

383 That is, in this case, we make about 0.1% error in force calculations, at least leg compression force calculations, by  
 384 using statics instead of dynamics. And, for most biomechanics purposes, 0.1% is *much* smaller than other errors we  
 385 make in muscle modeling, geometry, *etc.* So, by this calculation, statics seems reasonable, at least for calculation of  
 386 the overall forces involved in holding an equilibrium posture.

387 Note, however that the calculation above is misleading because the forces accurately calculated with statics are  
 388 of the legs supporting the horse, whereas the acceleration is of the body’s horizontal (fore-aft) position. If we  
 389 are interested in the lateral corrective forces, those match the lateral accelerations, and we probably need to use  
 390 dynamics to understand the motions near the equilibrium positions, and thus we need dynamics to study the stability  
 391 of these configurations.

392 Note: there are conceivable situations where study of oscillations near equilibrium could be essentially non-  
 393 dynamic, meaning non-inertial. For example: maintaining equilibrium in the presence of breathing; or motions  
 394 due to complex ‘history-dependent’ muscle properties (analogously, some friction-induced oscillations can be un-  
 395 derstood with just a statics analysis (*e.g.*, [23])). However, if our only concern is whether an equilibrium posture is  
 396 stable, or not, there is a relevant shortcut that finesses use of dynamics models: using potential energy.

## 397 **Potential energy and dynamic stability.**

398 If one just wants to know if an equilibrium configuration of a mechanical system (say a posture) is stable, and if the  
399 forces can be modeled as either state dependent — meaning that all gravity and muscle forces only depend on the  
400 instantaneous positions of the horse parts, with no delays — or are viscous damping terms, a statics analysis is still  
401 useful. With such forces, a statics based potential-energy calculation correctly determines whether a configuration  
402 is dynamically stable or not (*i.e.*, the system is stable if the potential energy is at a local minimum).

403 For example, motions near equilibrium of a multi-degree-of-freedom system which are governed by equations of  
404 this form:

$$405 \quad M\ddot{q} + C\dot{q} + Kq = 0. \quad (4)$$

406 In this equation  $q$  is a list of numbers describing the deviation from equilibrium and  $M$ ,  $C$  and  $K$  are constant  
407 (mass, damping and stiffness) matrices that come from linearizing the equations of motion near the equilibrium.  
408 Assume that the mass matrix  $M$  and damping matrix  $C$  are symmetric. If the stiffness matrix  $K$  is not symmetric,  
409 the system has no potential energy (*i.e.*, the position dependent forces are not conservative). Assuming  $M$ ,  $C$  and  
410  $K$  are all symmetric, the system is stable if the dissipation is always positive (*i.e.*,  $C$  is positive definite) and if the  
411 associated potential energy is always positive ( $K$  is positive definite). That is, assuming positive dissipation, the  
412 system is dynamically stable if the equilibrium is at the bottom of a potential energy bowl.

413 In our case, with only one degree of freedom,  $q$  is just a single scalar number (say, the deviation of the hip joint angle  
414 from equilibrium), and  $M$ ,  $C$  and  $K$  are also numbers. Assuming  $C$  is positive (damping is dissipative), stability  
415 is determined by whether  $K > 0$  (stable) or  $K < 0$  (unstable). That is, dynamic stability can be determined by  
416 calculations of potential energy in the neighborhood of the equilibrium (a statics calculation of sorts) while never  
417 doing a dynamics calculation. In particular, for our horse model, we determine dynamic stability by looking at  
418 the net potential energy due to gravity (which contributes to making  $K$  negative) and due to the corrective springs  
419 (which contribute to making potential energy positive).

420 There is a separate question (discussed in Appendix E, below) whether this potential energy approach is a valid  
421 approximation if there are time delays.

## 422 **2D vs 3D.**

423 Here, we are doing a two-dimensional (2D) analysis. We view the horse from the side, considering only an analysis  
424 in the *sagittal = side-view = lateral-view* plane. In effect, then, the horse has two legs: the front leg(s), representing  
425 the pair of fore-limbs(s) and the back leg(s), representing the hind-limbs. We use a 2D, instead of 3D, analysis  
426 because:

- 427 1. The 2D results are simpler to understand than 3D results, in particular, the fewer the number of forces to  
428 consider, the more digestible are the results;
- 429 2. A real horse may be decently modeled as 2D some times and for some purposes:

- 430 • The side-to-side (left-right, medio-lateral) forces can be relatively smaller than fore-aft (cranio-caudal)
- 431 forces;
- 432 • The left-right (coronal, frontal plane, front view) leg splay is relatively smaller; and
- 433 • The horse and its posture are often nearly left-right symmetric (so side-to-side forces cancel); and
- 434 • The 2D results are exact features of the 3D mechanics; that is, if all 3D forces are projected into the
- 435 sagittal (side view) plane, and the forces on all horse parts are considered as the set on the left & right
- 436 pair added (*e.g.*, the rear legs ground force is the sum of all forces on both rear feet, added up), then the
- 437 2D statics results are exact results for the projections of the 3D forces and moments.



## 438 Appendix B: The horse model

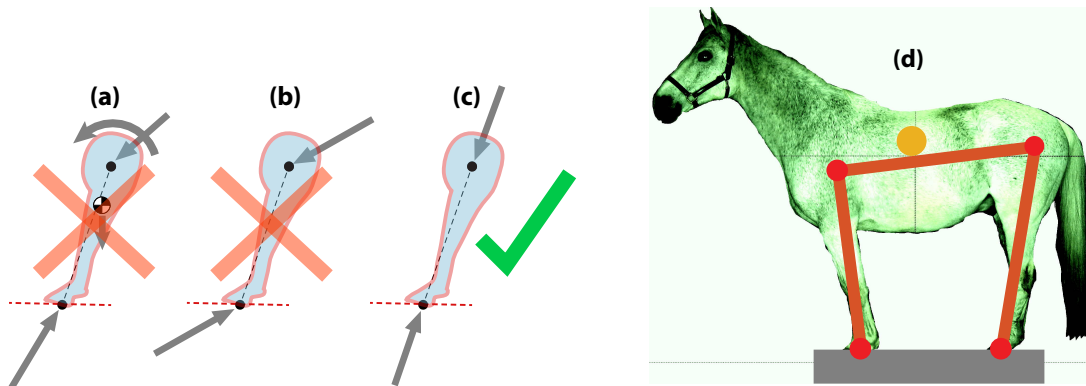

Filenames: hoof.pdf, horsemodel.pdf

Figure 4: **Leg as a ‘two-force object’ and Horse model.** If we neglect the weight of the legs, the legs are two-force objects. **a) General case.** This free body diagram includes the leg weight and also torques from muscles at the hip. **b) Two forces,** mechanics reasoning not yet applied. This free body diagram leaves off the leg weight and also torques from muscles at the shoulder or hip, but mechanics reasoning has not yet been applied. As drawn, it is not in equilibrium. **c) The leg as a two-force body.** Leaving off the hip torque and the leg weight necessitates that the two forces be equal and opposite and along the line connecting the points of application. This is the assumption we use in this paper. **d) The horse is made of three links:** forelegs, back (hind) legs; each pair is one link in the model. These 3 parts are connected with two hinges at the shoulder and hip.

439 In this appendix we consider some details of the horse model. The horse (Figure 2 on page 3 and Figure 4 on page  
440 21 ) is made of three rigid objects: 1) the fore-legs with length  $\ell_f$ ; 2) the rear legs with length  $\ell_r$ ; and 3) a back  
441 with length  $\ell_b$  connecting the front hoof F with the shoulder S and the rear hoof R with the hip H, respectively. The  
442 hoof ‘points’ F and R are at the centers of pressure of the hoof ground reaction forces (*i.e.*, the points where the  
443 equivalent single ground-reaction force-couple systems have no net torque). We do not attempt to find this point  
444 accurately, and take it to be at the rough ‘middle’ of the footprint. We neglect the weights of the legs. The horse  
445 mass is all attributed to the back and head. The center of mass G is a distance  $d_G$  back from S along SH, and  $h_G$   
446 orthogonally above the line SH. The distance between the legs, from F to R, is  $\ell = d_f + d_r$ , where  $d_f$  and  $d_r$  are  
447 the distance from the ground-projection of the Center of Mass G to the front and rear hooves, respectively.

### 448 A standing horse is a three-force object

449 First, consider the horse as a single stationary object with no concern for the presence, or absence, of muscular  
450 effort. We use  $\hat{i}$  to indicate the direction to the right, towards the horses rear, and  $\hat{j}$  to indicate vertical upwards.  
451 There are three forces acting on a whole horse considered as a single object:

1. The force of gravity,

$$\text{Gravity force} = -mg\hat{j}$$

452 acting at the center of mass G (or CoM) of the horse;

2. The total force of the ground on the front hooves (Fig. 4 on page 21),  $\vec{F}_f$  which can be decomposed in the vertical  $N_f$  and fictional (horizontal) part  $H_f$ , with

$$\text{Force on forelimbs} = \vec{F}_f = H_f\hat{i} + N_f\hat{j}; \text{ and}$$

3. The total force of the ground on the rear hooves,  $\vec{F}_r$  which can be decomposed in the vertical  $N_r$  and fictional (horizontal) part  $H_r$ ,

$$\text{Force on hindlimbs} = \vec{F}_r = H_r\hat{i} + N_r\hat{j}.$$

Neglecting the small motions during standing, and neglecting small forces (*e.g.*, wind), we can apply the laws of statics, using only the two ground forces  $-mg\hat{j}$ ,  $\vec{F}_f$  and gravity  $\vec{F}_g = -mg\hat{j}$ , three forces in total. Hence the horse is a so-called ‘three-force object’.

$$\begin{array}{lll} \text{Force Balance} & \text{(The forces add to zero)} & \sum \vec{F}_i^{ext} = \vec{0}, \quad \text{and} \\ & & \end{array} \quad (5)$$

$$\begin{array}{lll} \text{Moment Balance} & \text{(The torques add to zero)} & \sum \vec{M}_{i/C}^{ext} = \vec{0} \end{array}$$

453 The moment balance (or torque balance) equation holds relative to any point C. As per any introductory statics  
454 book (*e.g.*, [24]), we can use these two principles to draw various conclusions about the forces.

### 455 **Features of 3-force object equilibrium:**

- 456 1. **‘3-force object’.** Consider a point C at the intersection (if such exists) of the lines of action of the forces at  
457 the front hoof and at the rear hoof. The only force with moment about C is gravity. For there to be no net  
458 moment the gravity moment must also be zero. So, moment balance about C implies that the two ground  
459 reaction forces, at the forelimbs and hind-limbs, are either (Fig.2 on page 3)
- 460 i. **vertical**, or
  - 461 ii. have **lines of action that intersect at a point directly above G**, or
  - 462 iii. have **lines of action that intersect directly below G**;
- 463 2. **The ground carries the weight.** The vertical component of force equilibrium implies that the vertical ground  
464 reaction forces add up to the weight:  $N_f + N_r = mg$ ;
- 465 3. **Lever rule.** Moment balance about the point on the ground under the center of mass implies that  $N_f d_f =$   
466  $N_r d_r$
- 467 4. **Vertical forces are determinate:** Moment balance about the rear feet and about the front feet, together imply  
468 that the vertical ground reaction components are:  $N_f = (d_r/\ell)mg$  and  $N_r = (d_f/\ell)mg$ ;

469 **5. Horizontal forces cancel but are indeterminate.** Force balance in the horizontal ( $\hat{i}$ ) direction implies that  
470 the horizontal ground reaction forces are equal and opposite,  $H_f = -H_r$ . These forces are otherwise inde-  
471 terminate (*i.e.*, the magnitude of these canceling forces cannot be found from the laws of statics);

472 Any 2D statics model of a horse, and any measurement of a real horse that is effectively stationary, must have forces  
473 obeying all of the above relations. These apply no matter whether the leg weight is included, or not, and whether  
474 or not there are muscle contractions making the legs not ‘two-force-objects’. These, above, are the strongest, most  
475 model-independent, results from statics as applied to whole horses in the sagittal plane.

### 476 **Approximating the legs as two-force objects**

477 Treating the horse as a 2D linkage with left-right symmetry in structure and in coordination, we can consider the  
478 two forelimbs as a single object which we will call the fore-leg, and similarly for the hindlimbs. Before simplifying,  
479 we show a free body diagram of a horse leg in Fig. 4a on page 21 which shows these forces:

- 480 • the ground reaction force  $\vec{F}_g$  acting on the hoof at the ground. This ground reaction force  $\vec{F}_g$  includes both a  
481 normal (vertical) component and a sideways frictional component;
- 482 • the gravity force on the leg  $mg$  pointing down;
- 483 • the joint force, from the body to the leg, at the hip  $\vec{F}_h$ ; and
- 484 •  $M_h$ , the moment of the hip muscles, tendons and ligaments at the hip. These act on the leg from the horse  
485 body.

486 Because horse mass is much greater than the leg mass, we neglect the leg mass. Because we might assume that  
487 the horse chooses standing postures which minimize muscle tensions and thus minimizes joint torques, we neglect  
488 torque at the joints (for finding equilibrium postures here, the muscle forces are central in the stability calculations).  
489 Thus, the free body diagram of a leg (pair) has on it only two forces: one from the ground and one from the shoulder  
490 (or hip) as shown in Fig. 4b. These forces can only be in equilibrium if the forces are equal and opposite and have  
491 a common line of action (‘two-force members’ or ‘two-force bodies’ in *e.g.*, [24]), as shown in Fig. 4c.

492 *The forces on a horses leg, at the hip and ground, are well approximated as being equal and opposite*  
493 *and along the leg (along the line connecting the hip and hoof).*

494 So, the ground reaction force at the front hoof points towards the shoulder and the ground reaction force at the rear  
495 hoof points towards the hip. This modifies Fig. 2 to include information about the leg geometry (Fig. 4c on page  
496 21).

497 **Equilibrium of standing, taking account of the legs as two-force objects**

498 Taking account that the legs are two-force objects changes the results of Fig. 2 on page 3 to those shown in Fig.  
499 4 on 21. That is, in addition to the hoof forces intersecting at a point above or below the center of mass, they are  
500 along the lines from the hooves to the shoulder and hip. For a pendulum we could recognize equilibrium by the  
501 center of mass being above or below the hinge. Whereas, for a horse:

502 *The equilibrium posture of a horse has the lines along the legs intersecting directly above or below the*  
503 *horse center of mass.*

504 The point of intersection of the two leg lines is, for a horse, somewhat analogous to the location of the hinge for  
505 a pendulum; in both cases, the center of mass has to be directly above or below that point in order to achieve  
506 equilibrium (see Appendix D for further discussion of the pendulum analogy).

## 507 **Appendix C: Calculation of stability of a standing horse**

508 These calculations are the same in spirit as the similar calculations for an inverted pendulum shown in Appendix  
509 D. Appendix D, below, on the inverted pendulum analogy, should be read first if this calculation is hard to follow.  
510 The standing horse can be considered as a 3-object mechanism (Fig. 4 on page 21).

- 511 1. The fore-limbs are hinged to the ground at the front hoof (hooves) and to the body at the shoulder;
- 512 2. The body is hinged to the forelimbs at the shoulder and at the hip; and
- 513 3. The rear legs are hinged to the horse at the hips and the ground at the rear hoof (hooves).

514 Note: in mechanical design, this 3-link model is called a ‘four-bar-linkage’ (the ground is the so-called fourth link).  
515 Given the position of the hooves and the lengths of the body parts, this linkage has one degree of freedom. That is,  
516 one number, say the angle  $\theta_f$  of the fore-legs, determines the all of the other positions and angles.

### 517 **Calculation of stability using potential energy**

518 At each configuration of the linkage there is a gravitational potential energy  $E_p$ , which is the weight times the  
519 height of the center of gravity,

$$520 \quad E_p(\theta_f) = mgy_G. \quad (6)$$

521 Note, to use this equation one must find the height  $y_G$  of the center of mass in terms of  $\theta_f$  (for the horse mechanism,  
522 this is a non-trivial geometry/trigonometry problem with no simple formula). Any equilibrium posture (linkage  
523 configuration) is one in which all of the laws of statics hold for the whole horse and any of its parts. Assuming  
524 legs with negligible mass and negligible muscle and ligament torques, the possibilities are shown in Figure 4 on  
525 page 21. A theorem from statics is that such a configuration is also one where the potential energy is ‘stationary’,  
526 meaning,

$$527 \quad \frac{dE_p(\theta_f)}{d\theta_f} = 0. \quad (7)$$

528 This means that the equilibrium (zero muscle force) posture of a horse is at a (local) potential energy maximum, or  
529 minimum, or a stationary point. In all of our calculations for semi-realistic horse proportions, we always find the  
530 equilibrium postures to be at a local maximum of potential energy; the energy function is an upside-down bowl.  
531 That is, we always find that when we find a  $\theta_f$  that satisfies Eqn. 7 that it also satisfies

$$532 \quad \frac{d^2E_p(\theta_f)}{d\theta_f^2} < 0. \quad (8)$$

533 Such an equilibrium, at a potential energy maximum, is unstable. If disturbed ever-so-slightly from this configu-  
534 ration the horse would, if there were no ligaments, muscle forces or other joint torques, fall down. That is, in our  
535 three-link model, a standing horse in equilibrium is, with no muscle effort, unstable. Nonetheless, horses do stand  
536 for extended time without falling. So, horses must apply corrective torques. That is, when the horse is slightly out

537 of position (slightly away from the zero-torque equilibrium posture), there must be corrective torques that bring the  
538 horse back to, we presume, near the zero-torque equilibrium posture. There are a variety of known sources of these  
539 torques, namely

- 540 1. Muscular forces actively (dynamically) controlled using sensory and motor loops;
- 541 2. Muscular tonic contractions, where the intrinsic stiffness of active muscles resists joint-angle changes;
- 542 3. Passive ligaments that stabilize the joints; or
- 543 4. A bone and ligament morphology that effectively locks the joints (*e.g.*, the equine check and stay apparatus).

All of the mechanisms above likely have the feature that deviations from equilibrium posture lead to corrective torques, thus the behavior of any or all of them is somewhat like that of torsional springs,  $k_f$  and  $k_r$ , at the joints. So, we now consider joint torques that only apply if the joint angles,  $\theta_f$  and  $\theta_r$ , deviate from equilibrium, these are:

$$M_f = k_f \Delta\theta_f \quad \text{and} \quad (9)$$

$$M_r = k_r \Delta\theta_r \quad (10)$$

544 where  $\Delta\theta_f$  and  $\Delta\theta_r$  are the deviations of the joint angles relative to equilibrium. The addition of these springs does  
545 not change the equilibrium posture, but the springs do change the stability. Namely, the potential energy is now:

$$546 \quad E_p(\theta_f) = mgy_G + k ((\Delta\theta_f)^2 + (\Delta\theta_r)^2) / 2 \quad (11)$$

547 where, for simplicity of modeling, we use the same spring constant at both joints, *i.e.*,  $k = k_f = k_r$ . For a given  
548 horse model with given hoof placement we can solve for the equilibrium posture (configuration). And, using Eqn.  
549 11 we can also find the minimum value  $k_{min}$  of  $k$  in order to make the posture stable. That is, we apply Eqn. 11 to  
550 the critical condition (inequality in Eqn. 8 turned to equality),

$$551 \quad \frac{d^2 E_p(\theta_f)}{d\theta_f^2} = 0. \quad (12)$$

552 and solve for  $k$ , calling that  $k_{min}$ .

553 For each hoof placement, canted-in, vertical, or splayed-out, we can find the associated equilibrium posture one  
554 of two ways: either using the two-force-object and three-force-object reasoning above, or by finding stationary  
555 points for the gravitational potential energy. As described so far, the model allows some non-physical postures, for  
556 example, hanging upside down from the ground surface. We exclude this. Depending on leg and body lengths, there  
557 can also be very-crooked equilibrium postures, with the hip much above or much below the shoulder. And postures  
558 above and below ground with the legs crossed and the body possibly upside down. There is just one above-ground  
559 posture that has the legs not crossed, the body near level and that satisfies the equilibrium equations. Our numerical  
560 calculations find that this posture is always unstable. For this one equilibrium above-ground posture, we seek the  
561 minimum needed stiffness  $k_{min}$  for it to gain stability. Because of the complex geometry of the linkage, and lack  
562 of symmetry, both the find-equilibrium and evaluate-stability calculations are done numerically.

## 563 Numerical calculations

564 The horse length and mass parameters are given in Appendix F. We chose to parameterize the postural choice with  
565 leg splay as measure by the hoof-to-hoof ground spacing, the length  $\ell_g$ .

566 **Find equilibrium geometry using numerical root finding.** Given  $\ell_g$  we then consider a candidate value for the  
567 slope  $\theta_f$  of the fore-leg. Given  $\theta_f$ , the law of sines and the law of cosines finds the full 4-bar linkage geometry,  
568 including all link angles and all joint positions. We then did numerical root finding to find that value of  $\theta_f$  which put  
569 the intersection of the two leg lines directly above, or directly below, the horse center of mass. That configuration  
570 is, as per the three-force-object reasoning, the equilibrium standing configuration for the given leg splay.

571 **Numerical stability calculation.** Given the equilibrium configuration for given  $\ell_g$ , we then found the equilibrium  
572 configuration's stability as follows. We varied  $\theta_f$  in the neighborhood of the equilibrium position. For each  $\theta_f$  we  
573 found a consistent linkage geometry and associated center of mass height and hence (multiplying by  $mg$ ) potential  
574 energy. We then did a polynomial fit of that function and recorded the quadratic term. We similarly found the best  
575 fit for the sums of squares of the shoulder and hip joints *vs*  $\theta_f$  in the neighborhood of equilibrium. Given those two  
576 fits we could find that torsional spring constant  $k$  so that if one such spring was put at the shoulder, and the other  
577 at the hip, that the net quadratic term in the potential energy would be zero. This is the so so called "minimum  
578 required joint stiffness"  $k_{\min}$ , displayed graphically in Fig. 3 on page 8.

## 579 Intuitive explanation of mechanics

580 The basic result, that a splayed-out posture is more stable (by our measure), can be predicted qualitatively without  
581 need for detailed calculations. For the torque at a joint to have effect on the whole mechanism motion, the whole-  
582 mechanism motion must involve changes in that joint angle. Imagine a horse that is so canted-in that the front  
583 and rear hooves nearly touch. Then, if that horse rocks forward (or backward), still keeping its feet on the ground,  
584 there is significant falling even though there almost no change in the shoulder or hip angles (the horse falls almost  
585 like a triangle rocking on its lower vertex). Thus, for that extremely canted-in posture, springs at the shoulder  
586 or hip joints would have almost no effect (have almost no righting torque, cause almost no change in potential  
587 energy, do almost no work). When the legs are more spread, the joint angle changes are bigger for a given rocking.  
588 Bigger joint-angle changes have a dual effect: bigger angle changes with a given amount of falling cause bigger  
589 rotation-induced spring torques; and, due to the reciprocal nature of mechanical advantage, also, have a bigger  
590 mechanical advantage (*i.e.*, bigger effect on the mechanism for given spring torque). Meanwhile, the curvature of  
591 the gravitational potential energy near equilibrium, as a function of leg splay, is slight (the circular arc of CoM  
592 motion when the legs are parallel is similar to the near-circular arc when the legs fully canted-in). So, due to the  
593 enhanced utility of the springs in splayed-out posture, the splayed out posture is 'more' stable (by our measure,  
594 which is *not* the only plausible measure, see appendices D and E below).



595 **Appendix D: Pendulum analogy**

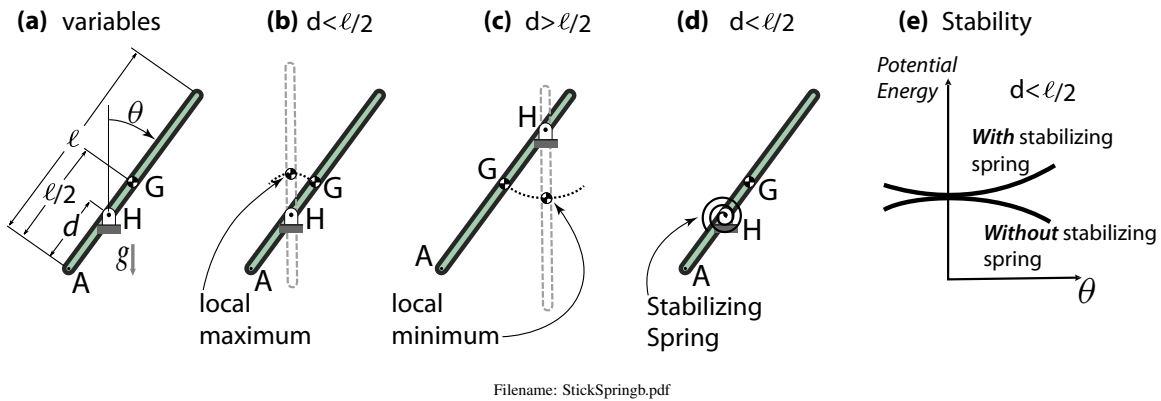

Figure 5: **Pendulum: Stability, and stability of equilibrium.** (a) End at A, hinge at H, Center of Mass at G, tipped an angle  $\theta$  from vertical; (b) Center of mass above the hinge is unstable, equilibrium is at a potential energy maximum; (c) Center of mass below the hinge is stable, equilibrium is at a potential energy minimum (d) A spring is added to the unstable configuration; (e) The unstable configuration is made stable by the addition of a spring, changing a potential energy maximum (bowl down, unstable) into a potential energy minimum (bowl up, stable).

596 The concepts of equilibrium, and stability of equilibrium, are perhaps best understood using a simpler system.  
 597 Consider a pendulum: a stick with length  $\ell$  connected to the fixed ground by a hinge at H (Fig. 5a on page 28).  
 598 The stick, while not looking like a horse, exemplifies the concepts of equilibrium and stability of equilibrium. The  
 599 average position of the stick mass is at the middle G of the stick. This is the center of mass (CoM). The hinge H is  
 600 a distance  $d$  from the lower end of the stick at A. The hinge H is assumed to be well made and well lubricated, so  
 601 does not resist rotation of the stick. However, we could apply torques at the hinge with muscles, or some proxy for  
 602 muscles (e.g., a motor or a torsional spring). In this analogy, ‘posture’ is the chosen position of the hinge  $d$ , and the  
 603 chosen angle  $\theta$ . Now consider equilibrium, and stability of equilibrium, of this stick considered as functions of the  
 604 parameters.

605 **Equilibrium ‘posture’ for a pendulum**

606 All of the configurations drawn in Fig. 5 on 28 have  $\theta \neq 0$  and  $\theta \neq \pi$ , they are all non-equilibrium. Equilibrium  
 607 configurations are shown dotted in Figs. 5b and 5c. If the stick is put in a *non-upright* (non-equilibrium) configu-  
 608 ration and the hinge is not at the center of mass ( $d \neq \ell/2$ ) then, if it is released from rest it will tend towards an  
 609 upright position: If the center of mass G is above the hinge ( $\ell/2 > d$ , Fig. 5b), it will fall away from upright; and  
 610 if the the center of mass is below the hinge ( $\ell/2 < d$ , Fig. 5c) it will swing up towards vertical. Thus, all tipped  
 611 positions are, unless the hinge is *at* the center of mass ( $d = \ell/2$ ), not equilibrium positions; the moments do not  
 612 balance and the stick tends towards upright, by falling or swinging. The set of equilibrium positions are places  
 613 where (a perfect) stick can stay indefinitely without falling. The equilibrium positions are those for which either  
 614 the hinge is at the center of mass ( $d = \ell/2$ ), or for which the stick is upright ( $\theta = 0$  or  $\theta = \pi$ ).



615 Assuming no disturbances, it takes no torque to hold an equilibrium position. This is true if H is above G ( $d > \ell/2$ )  
616 or if H is below G ( $d < \ell/2$ ). Alternatively, the stick stays in place if  $d = \ell/2$ . In short, the set of equilibrium  
617 positions are then  $\theta = 0$ , for all values of  $d$  and for  $d = \ell/2$  for all values of  $\theta$ . (The special case when G is at H  
618 and there are multiple equilibrium orientations, is not relevant to the always-unstable horse discussion.)

## 619 **Stability of equilibrium**

620 The vertical equilibrium postures are, intuitively, quite different depending on whether the center of mass G is  
621 above ( $d < \ell/2$ , Fig. 5b) or below ( $d > \ell/2$ , Fig. 5c) the hinge. Actually, if the center of mass is above the hinge,  
622 many people have trouble accepting that that is indeed an equilibrium position at all. If the center of mass is above  
623 the hinge, the stick would obviously fall. But ideally, if it was a perfect stick, and placed perfectly vertically, it  
624 would not fall, at least not for a very long time. So the position where the center of mass is directly above the hinge  
625 is still, at least in the language of mechanics, ‘in equilibrium’; to keep that stick upright you don’t need to apply  
626 a torque to the left, nor to the right. On the other hand, practically speaking, you have to hold it to keep it from  
627 falling. That is, the upright configuration is an *equilibrium* posture, but it is an *unstable equilibrium*.

- 628 • **Equilibrium** postures can be held with no extra torque at the hinge.
- 629 • **Non-equilibrium** postures require constant joint torques to be held.
- 630 • **Stable equilibrium** postures are ones where, if disturbed from equilibrium a tiny amount, the system will  
631 tend to return towards that equilibrium with no muscular torques.
- 632 • **Unstable equilibrium** postures are ones where, if disturbed from equilibrium a tiny amount, the system will  
633 tend to exponentially deviate from the equilibrium.

634 **Potential energy.** The stick is in equilibrium if it is vertical. The vertical equilibrium is only stable if the center  
635 of mass hangs below the hinge ( $d < \ell/2$ , Fig. 5c). The vertical equilibrium is unstable if the center of mass is  
636 above the hinge ( $d > \ell/2$ , Fig. 5b). More technically, the equilibrium is stable if the system potential energy is at  
637 a local minimum, and unstable if it is at a local maximum (see Fig. 5e). For this system, the potential energy is  
638 proportional to the height of the center of mass. Relative to nearby configurations (nearby values of  $\theta$ ) the vertical  
639 stick is at a locally minimum-energy height (*i.e.*, stable) if the center of mass G is below the hinge H. And it is at a  
640 locally maximum height (*i.e.*, unstable) if G is above H.

## 641 **Quantifying pendulum instability**

642 In relation to the more complex horse problem, the relevant pendulum cases are when the hinge is below the center  
643 of mass ( $d < \ell/2$ ); having  $d < \ell/2$  is like the horse being above the ground; having  $d > \ell/2$  would be analogous  
644 to a horse hanging by its hooves upside down from the ceiling ☺ (to be complete, there are also non-physical  
645 cockeyed equilibrium postures that our horse model can exhibit, but which a real horse could not exhibit). We are  
646 only interested in intrinsically unstable equilibrium postures. These are analogous to an ‘inverted’ pendulum.

We can make an unstable posture into a stable posture by always being at the ready with corrective torques. For example, if we add a stiff-enough spring to the hinge, one that tends to center the stick at  $\theta = 0$ , we can make an unstable stick into a stable stick (Fig. 5d). One way of quantifying the amount of intrinsic (pre-correction) instability is by the size of the spring needed to make the unstable configuration stable. For the pendulum, the total potential energy is

$$\begin{aligned}
 E_p &= \underbrace{k_{\text{torsion}}\theta^2/2}_{\text{spring potential energy}} + \underbrace{mg(d - \ell/2)\cos(\theta)}_{\text{gravitational potential energy}} \\
 &\approx mg\ell/2 + \underbrace{\left(\frac{k_{\text{torsion}} - mg(d - \ell/2)}{2}\right)}_{\text{Must be } > 0} \theta^2.
 \end{aligned}
 \tag{13}$$

647 We used the small-angle approximation that  $\cos \theta \approx 1 - \theta^2/2$ . To make  $E_p$  an upwards shaped bowl function of  $\theta$   
 648 (that is, to make the equilibrium a potential energy minimum) we need the coefficient of  $\theta^2$  to be positive (see Fig.  
 649 5e). So, stability only occurs if the torsional spring has a big-enough constant

$$k_{\text{torsion}} > mg(d - \ell/2).
 \tag{14}$$

651 The otherwise-unstable vertical pendulum is stabilized by the addition of a  $k_{\text{torsion}}$  satisfying the inequality above.

652 Adding the (big-enough) spring potential energy to the gravitational potential energy changes the upright config-  
 653 uration from a potential energy maximum (dynamically unstable) into a potential energy minimum (dynamically  
 654 stable). With a big enough spring, as  $\theta$  is deviated from 0, the increase in spring energy will win over the decrease in  
 655 gravitational potential energy. The more that the center of mass is above the hinge (the bigger the distance  $d - \ell/2$ ),  
 656 the bigger the needed stabilizing spring needed to make this otherwise unstable equilibrium posture stable.

657 A spring is equivalent to a linear (proportional) controller. So, our measuring uncontrolled instability by the min-  
 658 imum added spring to gain stability is like measuring the amount of uncontrolled instability by the minimum  
 659 feedback gain needed to obtain stabilization. Thus, we might think of this spring as a proxy for the amount of  
 660 neuro-muscular control needed to hold a pendulum upright. This neuro-muscular control could be through a feed-  
 661 back loop or through tonic muscular action, such as with co-contraction. In a feedback loop, the deviation would  
 662 be sensed, and then corrective muscle contractions commanded. In, say, co-contraction, pairs of opposing muscles  
 663 would be continuously held on, and the pair of muscles would act like a corrective spring. In either mode of control,  
 664 the bigger the needed spring in the model, the bigger the needed neuro-muscular control in the biological system.

665 With the horse model, the situation is analogous. The calculations for the horse model are more complicated, and  
 666 in the horse model, the amount of spring needed depends on the posture (the spacing between the feet).

667 **An alternative quantification of instability: eigenvalue.** If disturbed slightly from an equilibrium configuration,  
 668 an unstable system diverges exponentially from the equilibrium. An alternative quantification of instability to our  
 669  $k_{\text{min}}$  described above, would be the characteristic time of this exponential growth; the shorter that time, the faster

670 the growth, the more unstable is the system. The inverse of this characteristic time is the ‘eigenvalue’  $\lambda$  (meaning,  
671 characteristic value). By the eigenvalue measure of instability, the bigger the eigenvalue the more unstable the  
672 system. More technically, near an unstable equilibrium all quantities grow in time in proportion to  $e^{\lambda t}$ , so  $\lambda$   
673 measures the rate of growth.

674 Consider a point-mass inverted pendulum with massless stick length  $\ell$ , point mass  $m$  and gravity  $g$ . Now consider  
675 a variety of other pendula with different values for length, mass and gravity, and compare their instability by the  
676 two measures above ( $k_{\min}$  and eigenvalue  $\lambda$ ).

- 677 1. Double  $m$ . This doubles the needed stabilizing spring  $k_{\min}$  but has no effect on the eigenvalue  $\lambda$ . Thus, this  
678 would be a more unstable pendulum by the  $k_{\min}$  measure and equally unstable by the  $\lambda$  measure.
- 679 2. Double  $\ell$ . This slows the characteristic time of falling but increases the spring needed for stabilization. That  
680 is, the two measures of instability have opposite trends for pendulum length changes.

681 **Generalized measure of instability.** Imagine balancing an upright broom on the palm of your hand by moving  
682 your hand around. Now imagine trying to similarly balance a pencil. Clearly, in that context one would say that a  
683 pencil is more unstable because it is harder for a person to balance. On the other hand, imagine an upright 5m (quite  
684 tall) ladder on the ground, but leaning against nothing. You are to hold it there. Then imagine a person climbing to  
685 the top, and you are still trying to balance the ladder. Clearly the ladder is more unstable when there is a person on  
686 top. For the pencil vs broomstick, the eigenvalue measure seems a more appropriate measure of instability. For the  
687 ladder vs ladder with person up top, the minimum-stabilizing-spring is a better measure.

688 What is a generalization that uses the right measure in the right context? One idea is to measure instability by the  
689 difficulty of control using the hardware and software that are available for actual control system that is in use. The  
690 pencil is more unstable than the broomstick because it demands a neural control loop that is faster than a person  
691 has available. The ladder with a person up top is more unstable because, for the size of deviations from vertical a  
692 person can detect, the heavy-topped ladder needs more strength than the person has available.

693 If one knows which issue is the main challenge for the control system of interest, one can pick an appropriate  
694 measure of system instability. If speed of response is the critical issue, the eigenvalue measure is more relevant. If  
695 size of the required force for a given deviation is critical, then the minimal-stabilizing-spring, our choice for this  
696 paper, is most relevant.

## 697 **Appendix E. Neglect, or not, of neural delays; passive tonic vs active feedback**

698 **Corrective torques.** As noted, a horse's standing posture is unstable without corrective torques. There are various  
699 possible sources for these torques listed in Appendix A. We focus on the corrective torques from muscles (more  
700 precisely, muscle-tendon complexes). These could be of three kinds:

701 1. **Tonic stiffness.** Muscle torques based on muscle's intrinsic stiffness. This is the slope of the muscles force-  
702 length curve in a quick (too fast for neural feedback) imposed extension (neglecting, or subtracting out,  
703 viscous/hystoretic effects). Intrinsic stiffness does not involve feedback via neural control. As noted in *e.g.*,  
704 [27] muscle intrinsic stiffness is more-or-less proportional to the present muscle force. So, intrinsic stiffness  
705 is only significant if a muscle is activated. There are two ways this can happen in a static posture:

- 706 (a) Co-contraction, with flexors and extensors in opposition; and  
707 (b) Contraction opposing an external force. For example, this non-co-contraction tonic state is generally  
708 thought to be an approximation of the state of a typical standing person (*e.g.*, [19]); the person is leaned  
709 forwards of equilibrium to put their center of mass slightly forwards of the ankle, with gravity causing  
710 a disruptive torque (about the ankle hinge) and the achilles tendon (with soleus and/or gastrocnemius  
711 muscles) providing a counter-acting righting torque.

712 One might term the stabilization from intrinsic stiffness as 'tonic' (as due to a constant activation), 'passive'  
713 (as not involving active neural control), or even as a primitive form of 'feed *forward*' (in that it is a chosen  
714 activation pattern, albeit simple, that achieves the desired coordination without *feedback*);

715 2. **Corrective muscle torques** due to sensed deviations from equilibrium. These would be based on propriocep-  
716 tion (mechanoreceptors distributed in muscles, joints, ligaments and skin), visual (oculo-vestibular responses),  
717 or inner ear (vestibular end organs— otoliths and semicircular canals), processed in the spine or brain, and  
718 then leading to muscle commands. This corrective strategy might be termed as 'feedback' (activation based  
719 on sensing is fed back to the muscles) or as 'active' (in that the neural output is actively changing);

720 3. **A combination** of the two mechanisms, with some of the corrective torque do to tonic (intrinsic) stiffness and  
721 some due to active feedback control.

722 **Feedback delays.** For active neural feedback in an animal (or human) there are delays due to sensor delay, neural  
723 transit times to the spine or brain, neural processing time, neural transit time back to the muscle, and muscle delays  
724 (due to electrical, chemical and mechanical activation effects). These have a variety of delay times, depending on  
725 the pathways, that taken together are thought (for humans) to be in the range of 0.1s - 0.3s in [12].

726 A given postural control model may concern passive (tonic) stiffness or active (neural feedback) control or both.  
727 And the model may take account of neural delays, or may not. Our model here neglects neural delays and assumes  
728 proportional feedback. So, in our model, tonic stiffness and active proportional feedback are equivalent and in-  
729 separable, they both yield a (modeled as) instantaneous corrective torque proportional to distance from the target  
730 state.

731 **Grasp.** The stability of grasp has been studied with a similar philosophy as used in this paper. In both [21] and  
732 [27] only tonic (intrinsic, passive, instantaneous) corrective torques were considered. As pointed out in [27], if

733 only the second of these (in the list above) is considered (muscle fighting a load) the stiffness is proportional to  
734 the load. Applied to grasp, this muscle model (stiffness proportional to force) says that, without co-contraction, a  
735 grasp configuration is either stable, or not, depending on the geometry of the grasp but independent of the load;  
736 higher grasp forces proportionally increase both the geometric negative-stiffness and the muscle tonic stiffness. So,  
737 assuming muscle stiffness exactly proportional to load, one stiffness is bigger than the other for all grasp forces.  
738 If the intrinsic stiffness is greater, the grasp is stable. If the negative pre-stress (geometric) stiffness is greater, the  
739 grasp is unstable. (More exactly, for a multi-degree-of-freedom linkage model with this type of muscles, there is a  
740 net stiffness which is either positive definite or not, depending on geometry and not on the tightness of the grasp).

741 For the grasp stability studies mentioned above, feedback loops were not considered. This is reasonable — the  
742 characteristic time of grasp instabilities are so fast compared to neural delays, because of the low inertia of fingers,  
743 that there is not possibility of stabilization from (delayed) feedback loops.

744 **Tonic stiffness and standing stability.** As just noted, for human grasp, mechanism stability is neither improved  
745 nor decremented by the tightness of the grasp. However, applying this muscle-stiffness-is-proportional-to-force  
746 muscle description to a standing person or horse shows that stability can be enhanced by standing further away  
747 from equilibrium. That is, the effectively-negative gravitational stiffness is nearly constant with distance from  
748 equilibrium, but the muscle stiffness increases with distance from equilibrium because the needed muscle force,  
749 and thus muscle stiffness, goes up with distance from equilibrium.

750 **Neglect of intrinsic stiffness in human standing models.** In the study of the effect of leg spread on the stability  
751 of human standing, [3] ignore the intrinsic stiffness of muscles, only considering active feedback mechanisms that  
752 have neural delays. Similarly, [12] focus on neural feedback and not on 'passive' (meaning intrinsic without active  
753 neural control) stiffness.

754 Finally, [19] studying human standing claims that there is some stiffening from the intrinsic stiffness of active calf  
755 muscles and, on top of that there is a dynamic feedback loop.

756 It is sensible that an animal or person would choose to stabilize using a mixture of tonic (constantly contracted  
757 muscle) and feedback control, for two reasons (Art Kuo — personal communication):

- 758 1. There is a cost to varying muscle force. This cost is on top of the cost of maintaining a muscle force. Given  
759 that the sensors have limited resolution, feedback control necessarily involves force variation. If some of  
760 the stability is handled by tonic contraction (using intrinsic muscle stiffness), then there is less instability  
761 for the feedback system to contend with, and, for given sensor thresholds, smaller needed corrective torques.  
762 Depending on details of muscle costs for tonic forces vs the costs for the necessarily time-varying contractions  
763 used in feedback, there could be a savings of chemical energy used by using a mixture of tonic (intrinsic  
764 stiffness) and feedback control.
- 765 2. Muscles and tendons are non-linear, they are softer when the force is smaller. Starting with no force, to  
766 generate a small force slack needs to be taken up. Whereas, when a muscle is already contracted it takes less  
767 change in excitation, and there is less related muscle and tendon stretch, to effect a similar force change. That  
768 is, modulating an existent force is easier than modulating a force near to zero force.

769 **Combining active feedback and passive tonic controls.** As noted, our model treats active feedback control and  
770 passive tonic control as equivalent. That is, we assume that neural delays are not significant. Consider two animal  
771 systems A and B. Assume A can be stabilized with a smaller spring  $k_{\min A}$  than is needed for system B. No matter  
772 what the actual mechanism the animal uses, whether it is intrinsic tonic stiffness or feedback loops, or both, we  
773 assume that it is easier for the neural system to stabilize system A, with  $k_{\min A} < k_{\min B}$ , than B.

774 The error that we could be making is that neural delays could be a part of the challenge of postural control. If  
775 the observed sway dynamics has characteristic times comparable to delay times, or shorter, then delays probably  
776 cannot be neglected. If the characteristic sway dynamics have characteristic times much longer than the neural  
777 delay, then the neural delays are probably negligible and feedback loops are essentially dynamically equivalent to  
778 springs.

779 **Quick review of, and comparison with, Bingham *et al* [3].** For analysis of standing humans in the frontal plane,  
780 [3] use the same mechanical model as we are using for the horse, but with different parameters (that which is the  
781 horse body in our model is the human pelvis in their model). Their two key model findings are:

- 782 1. They notice that their model is *less* stable with spread legs than with vertical legs; and
- 783 2. They find that there is a range of feedback gains which stabilize the system. This range is smaller for spread  
784 legs than for parallel legs.

785 These results are, at least superficially, in contrast with our model results that

- 786 1. Our horse is *more* stable with legs splayed-out than with legs parallel; and
- 787 2. The minimum stiffness needed for stabilization is less for a splayed-out horse than for a parallel-legs horse.

788 Besides the differences in physical parameters (lengths, masses), our model differs from [3] in two key ways:

- 789 A. They use the eigenvalue  $\lambda$  as a measure of the degree of instability whereas we use the minimum corrective  
790 spring  $k_{\min}$ ; and
- 791 B. They assume all control is with neural feedback that has a delay, whereas, whether tonic or feedback-based,  
792 we neglect the delay.

793 **The differences between this paper and Bingham *et al*.** First, they have the result that splayed-out is more  
794 *unstable*, in contrast to our finding that splayed-out is more stable. Their result might be explained intuitively by  
795 the splayed-out posture being associated with a smaller inertia (less kinetic energy per unit leg angular-rate). Thus,  
796 although the gravitational negative stiffness is smaller with splayed out legs, the reduced inertia makes for a reduced  
797 characteristic time of falling (bigger eigenvalue) and thus less stability by their measure. On the other hand, when  
798 the legs are splayed out, a given motion of the center of mass is associated with large changes in the body-to-leg  
799 angles, so that our model's joint springs have a larger stabilization effect. Thus, by our measure, splayed out is  
800 more stable.



801 Second, is their result that splayed out is harder to control, in contrast to our result that splayed-out is easier to  
802 control. As noted just above, when splayed-out, the joint angles change a lot with center of mass motion, so any  
803 joint torques have larger control authority. Thus our result, that the minimum stabilizing springs are smaller. And  
804 thus, in our interpretation, less neurological control is needed (meaning smaller co-contraction or smaller leaning  
805 and mono-tonic contraction or smaller feedback gains). Consistent with us, they find that the minimum gains to  
806 stabilize the splayed out posture are smaller. But, their model includes neural delay. If one uses a gain much larger  
807 than the minimum-needed gain, then, in their dynamics model, the characteristic sway becomes faster with shorter  
808 characteristic times, eventually competing with neural delay times, and the control system becomes unstable (there  
809 is an oscillatory instability at a critical gain). On the other hand, at narrower stance, a higher control gain is needed  
810 (in both Bingham *et al* and our model). And, again, at sufficiently higher gain, their model becomes unstable. They  
811 find a smaller range of gains is stabilizing for wide stance as for narrow stance. Thus, they reason, that a control  
812 system that is challenged in its abilities to set gain levels, has an easier time setting the gain in narrow stance.

813 **Critical comment on objectivity in [3].** We do not know how a biological neural system quantifies gains. And,  
814 the concept of ‘narrower gain range’ depends on this measure. For example, the neural system might use the log  
815 of the engineering gain, or the reciprocal (the compliance). A range of gains that is smaller using engineering gain  
816 may not be smaller using these other measures. That is, the concept of ‘smaller gain range’ is not objective, in that  
817 it depends on how one chooses to measure gain (Unless one range totally encompasses the other, which is not the  
818 case in this model).

819 **Applicability of stability results to non-Parkinsons humans.** In most (non-Parkinsonian) situations where bal-  
820 ance is a challenge (neural ataxia), more-spread stances are chosen by both humans (wider) and horses (longer)  
821 [1, 4], not the narrower stance observed for standing human Parkinson’s patients. The Bingham *et. al.* [3] model,  
822 does not claim to be, and is not predictive in these other situations.

823 **Sway period in horses.** The simplest rationale for our neglect of delay in our quantification of neural challenge  
824 is that the observed sway periods for standing horses are on the order of seconds, whereas the neural delays are  
825 probably on the order of tenths of second. For such motions, feedback with and without delay would have similar  
826 predictions. That is, in contrast with human grasp control, for postural control in horses the characteristic times of  
827 motions are slow enough so that neural delay may not be relevant.

828 This possible irrelevance of neural delay for standing horses is apparently not the case for standing humans, how-  
829 ever, as witnessed by system identification [12] on humans being able to distinguish neural delay from instantaneous  
830 feedback.

## 831 Appendix F: Parameters in the model

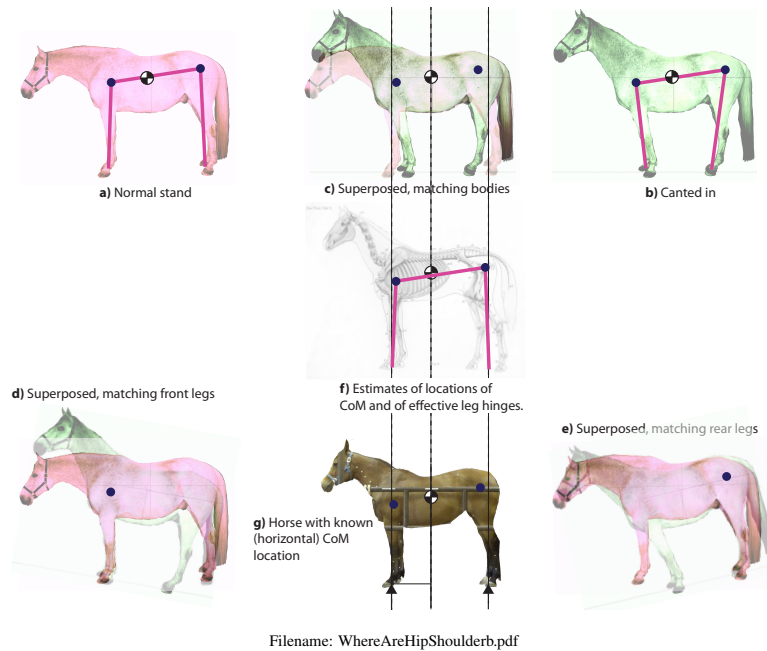

Figure 6: **Locating the CoM and the effective shoulder and hip.** One horse was photographed twice: **a)** once in normal posture and **b)** once with legs canted in. **c)** shown superposed. By rotating the photos **(d)** and **(e)**, locations are found for which relative rotation about those points best fits the observed motion of the leg relative to the body (d and e) and the body relative to the leg (c). **(g)** With a different horse, we found the center of mass using four force plates (unpublished data of Gellman K, Shoemaker JM, and Reese EM). All three horse images are rescaled to about the same size so that the effective hinges and the center of mass can be shown on all. For calculations, the dimensions for the effective leg lengths, back length, and center of mass location on the back, are measured from the photos, assuming a 16 hand (1 hand = 4”) horse. (photos by Judith M. Shoemaker)

832 For calculations we created a “standard horse” based on measurements from a few real horses. We scaled pictures  
833 to a common size so that pictures could be overlaid and compared. We scaled to a 16 hand horse, 64” from ground  
834 to withers (the high part of the back, just behind the neck).

835 **Location of shoulder and hip joints.** Location of the effective shoulder joint and hip joint was done by superim-  
836 posing photos of a single horse with more and less splayed legs. The effective shoulder is that point about which  
837 we can rotate one picture relative to the other so that in one case the legs are perfectly aligned and in the other  
838 the bodies are perfectly aligned. This point was found by sequential guessing using a graphics program (Adobe  
839 Illustrator). The hip was found similarly. All distances were measured from the scaled pictures.

### 840 Parameter values

841  $m = 500$  kg. More or less typical for a 16 hand horse;



842  $g = 10$  m/s. Close enough to the standard value of  $9.8$  m/s<sup>2</sup>;

843  $\ell_f = 1.05$  m. Fore-leg length, ground to shoulder hinge;

844  $\ell_r = 1.20$  m. Rear leg length, ground to hip hinge;

845  $\ell_b = 1.16$  m. Body length, shoulder hinges to hip hinge

846  $d_{CoM} = 0.50$  m. Distance along the shoulder to hip line from the shoulder hinge to the Center of Mass (CoM).

847  $h_{CoM} = 0.0$  m. We assume the CoM was on the shoulder to hip line, thus the height of the CoM above that line is zero.

848

849 Leg splay  $\ell_g$  (also called  $d$ ) is measured as the distance between the ground placement of the front and rear hooves.

850 This parameter was varied.

## 851 **Appendix G: Collapsed Postures**

852 This last example of canted-in posture is more tentative. Totally exhausted or traumatized humans can take on  
853 a characteristically collapsed, hunched-over posture. We see this posture in photos of prisoners of war, refugees  
854 fleeing a natural disaster or combat, and survivors of a traumatic event. Similarly, there is some indication that  
855 exhausted horses may have a characteristic canted-in posture. This is depicted in the sculptures “The Tired Hunter”  
856 by J. Willis Good (1875) and also the “End of the Trail”, by James Earle Fraser (1905) [8]. Both portray horses  
857 with narrow (canted-in) stance, and the latter also shows a rider with collapsed upper body posture. One possible  
858 explanation for these collapsed postures might be that conscious cognitive signals (intent) for upright posture are  
859 diminished in the exhausted individual, with a corresponding loss of flexor inhibition and extensor tone (Dr. Carl  
860 DeStefano — personal communication). Another possibility, (which may also apply to EMND) is that in these  
861 collapsed postures, the balancing torques are carried by bones and ligaments instead of muscles. In this explanation,  
862 these collapsed postures would not be chosen in normal circumstances because they are likely uncomfortable,  
863 possibly damaging to tissue, and not conducive to versatile functioning. One can view these mechanisms as failures  
864 of motor output.
